# Supplementary material
Source: Research Square preprint supplement (doi:10.21203/rs.3.rs-9148185/v1)
Supplement: Supplementary file 1 [file a39d01c79b803efb67a6633c.docx]

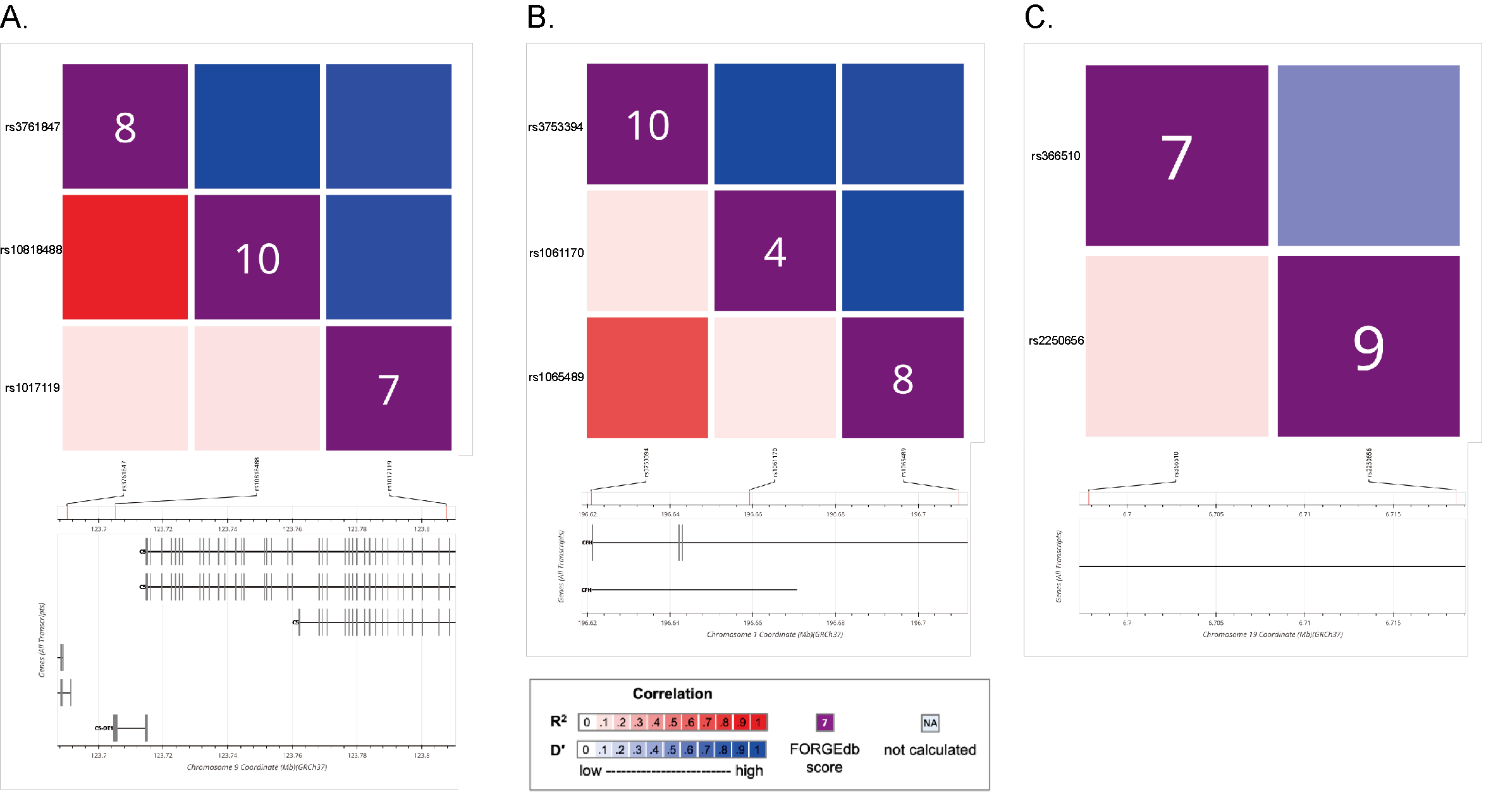


**Supplementary Figure 1.** Results of linkage disequilibrium analysis and the location of each SNP in the genome **(A)** Linkage disequilibrium (LD) heatmap and genomic mapping of SNPs rs3761847, rs10818488, and rs1017119 on Chromosome 5 (GRCh37). **(B)** Linkage disequilibrium (LD) heatmap and genomic mapping of SNPs rs3753394, rs1061170, and rs1065489 on Chromosome 3 (GRCh37).
**(C)** Linkage disequilibrium (LD) heatmap and genomic mapping of SNPs rs366510 and rs2250656 on Chromosome 19 (GRCh37).

**Note:** In the LD heatmaps, the upper triangle (red-scale) represents the values, and the lower triangle (blue-scale) represents the values, indicating the correlation between SNPs. Purple squares on the diagonal display the functional scores of the respective SNPs according to the FORGEdb database. The bottom tracks illustrate the physical coordinates and relative positions of the SNPs within their local chromosomal context (GRCh37/hg19).
